# Supplementary material
Source: PubMed Central journal article supplement (PMC6439653)
Supplement: jamainternmed-179-161-s001.pdf [file jamainternmed-179-161-s001.pdf]

## Supplementary Online Content

Jennings LA, Laffan AM, Schlissel AC, et al. Health Care Utilization and Cost Outcomes of a Comprehensive Dementia Care Program for Medicare Beneficiaries. Published online December 21, 2018. *JAMA*. doi:10.1001/jamainternmed.2018.5579

**eAppendix 1.** Detailed Annual UCLA Alzheimer's and Dementia Care Program Costs

**eAppendix 2.** Additional Demographic and Clinical Characteristics of UCLA Alzheimer's and Dementia Care (ADC) Program Participants

This supplementary material has been provided by the authors to give readers additional information about their work.

**eAppendix 1. Detailed Annual UCLA Alzheimer’s and Dementia Care Program Costs**

| <b>Personnel Expenses</b>                                                 | <b>Annual Salary</b> | <b>Estimated Benefit Rate</b> | <b>FTEs</b> | <b>Total</b>       |
|---------------------------------------------------------------------------|----------------------|-------------------------------|-------------|--------------------|
| Nurse Practitioner Dementia Care Managers                                 | \$159,602            | 0.40                          | 5.0         | \$1,117,214        |
| Medical Director                                                          | \$218,000            | 0.40                          | 0.33        | \$100,716          |
| Clinical Psychologist/ Support Group and Seminar Series Leader            | \$147,128            | 0.40                          | 0.10        | \$20,598           |
| Program Manager                                                           | \$60,325             | 0.40                          | 0.25        | \$21,114           |
| Clinical Office Staff                                                     | \$47,050             | 0.40                          | 2.0         | \$131,740          |
| Dementia Care Manager Assistants                                          | \$50,914             | 0.40                          | 2.0         | \$142,559          |
| <b>Non-Personnel Expenses</b>                                             |                      |                               |             |                    |
| Community-based organization services                                     |                      |                               |             | \$85,000           |
| Care management software maintenance                                      |                      |                               |             | \$55,000           |
| Website maintenance                                                       |                      |                               |             | \$4,125            |
| Travel for dementia care managers                                         |                      |                               |             | \$5,000            |
| Telephone, pagers, and computer data plans for dementia care managers     |                      |                               |             | \$6,540            |
| Program brochures                                                         |                      |                               |             | \$1,500            |
| Supplies (copying, postage, delivery service, miscellaneous supplies)     |                      |                               |             | \$9,000            |
| <b>Total Annual Program Cost</b>                                          |                      |                               |             | <b>\$1,700,106</b> |
| <b>Program Cost per Participant per Year</b>                              |                      |                               |             | <b>\$1360</b>      |
| <b>Program Cost per Participant per Quarter</b>                           |                      |                               |             | <b>\$340</b>       |
| <b>Program Cost per Participant per Quarter Adjusted to 2013 Dollars*</b> |                      |                               |             | <b>\$317</b>       |

Based on active annual ADC program enrollment of 1250 participants.

Program cost per participant per quarter= (total program annual cost/1250 ADC participants per year)/4

\*2016 program costs were adjusted to 2013 dollars using a conversion factor of 0.932.

(Consumer Price Index for Medical Care. <https://www.hrsa.gov/get-health-care/affordable/hill-burton/cpi.html>. Accessed October 20, 2017)

Median national salary for a nurse practitioner is \$103,880 (IQR \$88,810, \$123,070). (US Department of Labor, Bureau of Labor Statistics, Occupational Employment Statistics, May 2017. <https://www.bls.gov/oes/current/oes291171.htm>. Accessed May 18, 2018)

**eAppendix 2. Additional Demographic and Clinical Characteristics of UCLA Alzheimer’s and Dementia Care (ADC) Program Participants, N=1083**

|                                                                |             |
|----------------------------------------------------------------|-------------|
| Variable                                                       |             |
| Mean Mini Mental State Exam Score (SD), range 0-30             | 17.9 (7.0)  |
| Mean Number of Basic ADL dependencies (SD) (out of 6 possible) | 1.9 (2.2)   |
| Education Level, N (%)                                         |             |
| Some high school or less                                       | 136 (12%)   |
| High school graduate                                           | 165 (15%)   |
| Some college                                                   | 214 (20%)   |
| College graduate                                               | 225 (21%)   |
| Graduate school                                                | 280 (26%)   |
| Missing                                                        | 63 (6%)     |
| Patient lives alone, N (%)                                     | 187 (17%)   |
| Caregiver relationship to ADC patient, N (%)                   |             |
| Spouse or partner                                              | 320 (30%)   |
| Adult child                                                    | 440 (41%)   |
| Other family member or friend                                  | 134 (12%)   |
| Missing                                                        | 189 (17%)   |
| Caregiver Female, N (%)                                        | 618 (57%)   |
| Mean Caregiver Age (SD)                                        | 63.5 (14.4) |
| Partnering physician type, N (%) (N=255 physicians)            |             |
| Primary care (internist, family medicine, or geriatrician)     | 232 (91%)   |
| Neurologist                                                    | 17 (6%)     |
| Other                                                          | 7 (3%)      |

Data included in this table are from ADC programmatic files and thus are not available for control participants, as these variables are not included in Medicare claims data. Alzheimer's diagnosis, duration of disease, age, gender, race/ethnicity, dual Medicare-Medicaid eligibility, Medicare coverage reason, Hierarchical Condition Category (HCC) score, and mean utilization and cost in the year prior to program enrollment for ADC participants and controls are included in Table 2.

ADL=Activities of Daily Living including feeding, transferring, toileting, dressing, bathing, and walking across a room
